# Supplementary material for: Tuning the adsorption and interaction of CO and O2 on graphene-like BC3-supported non-noble metal atoms
Source: Royal Society of Chemistry journal article supplement (doi:10.1039/c8cp00772a), 2018-01-01
Supplement: c8cp00772a1.pdf [file c8cp00772a1.pdf]

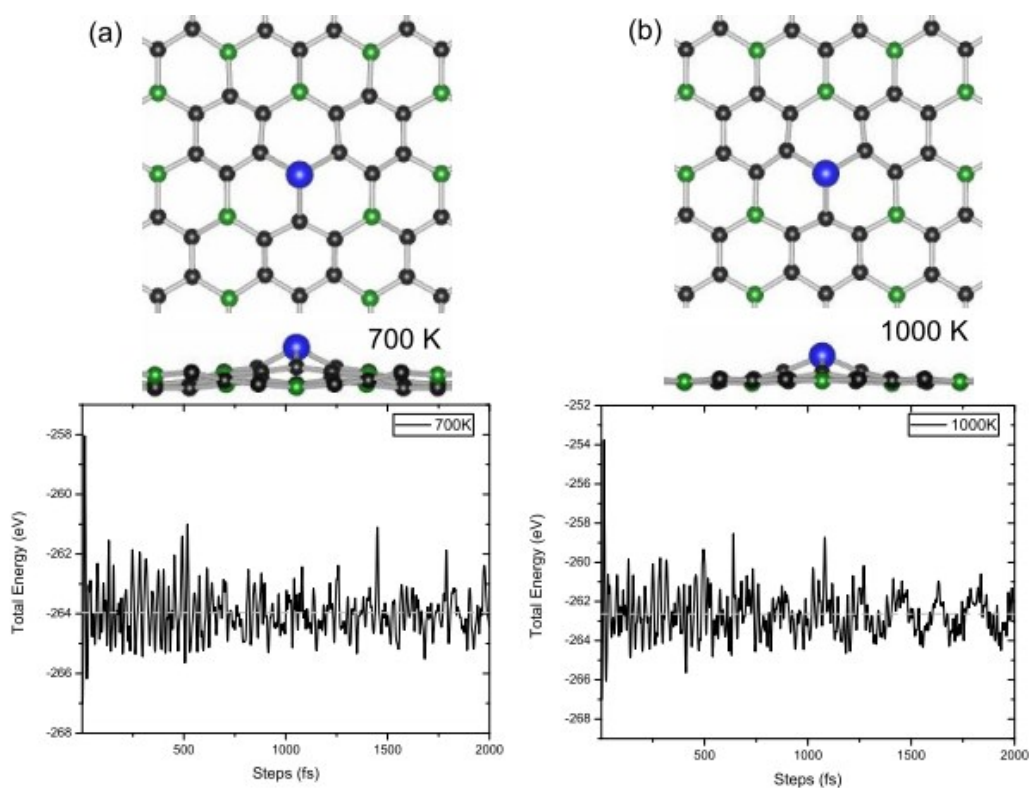

**Figure S1** Top and side views of the final Fe-BC<sub>3</sub> structure from the molecular dynamics simulation at (a) 700 K and (b) 1000 K. Black, green and blue balls represent C, B and Fe atoms, respectively.

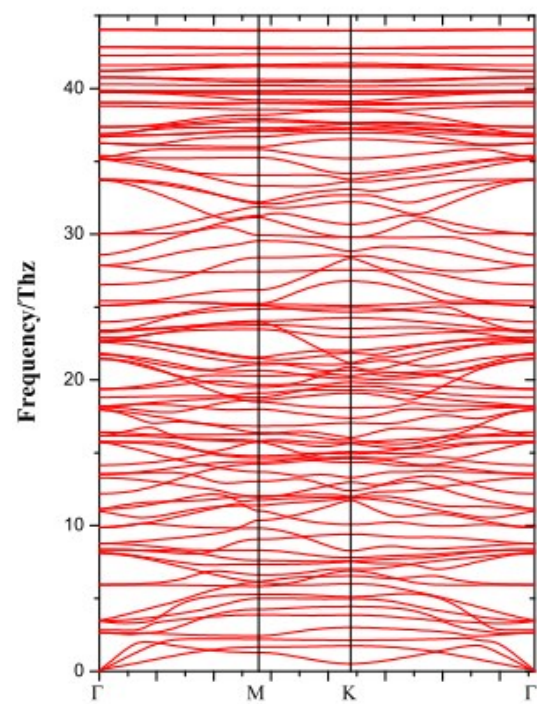

**Figure S2** Phonon spectrum of Fe-BC<sub>3</sub> monolayer.

**Table S1** The adsorption energy ( $E_{\text{ads}}$ , in eV) and magnetic moment ( $M$ , in  $\mu_B$ ) for single Fe atom or gas molecule (CO and  $O_2$ ) on the  $BC_3$  or Fe- $BC_3$  nanosheet by using different density functional (GGA-RP and GGA-PBE).

| systems | Fe/pri- $BC_3$   |     | Fe- $BC_3$       |     | $O_2$ /Fe- $BC_3$ |     | CO/Fe- $BC_3$    |     |
|---------|------------------|-----|------------------|-----|-------------------|-----|------------------|-----|
|         | $E_{\text{ads}}$ | $M$ | $E_{\text{ads}}$ | $M$ | $E_{\text{ads}}$  | $M$ | $E_{\text{ads}}$ | $M$ |
| GGA-PBE | 2.86             | 2.0 | 6.92             | 1.0 | 1.20              | 3.0 | 0.74             | 1.0 |
| GGA-RP  | 2.45             | 2.0 | 6.56             | 1.0 | 1.34              | 3.0 | 0.71             | 1.0 |
